# Supplementary material
Source: PubMed Central journal article supplement (PMC5763569)
Supplement: NIHMS917384-supplement-supplement_1.pdf [file NIHMS917384-supplement-supplement_1.pdf]

**Supplemental Table. Odds ratios and 95% confidence intervals for the interaction between pre-pregnancy BMI and postpartum weight retention with elevated postpartum depressive symptoms**

---

| Pre-pregnancy BMI <sup>3</sup> | Postpartum weight retention | Age-adjusted model <sup>1</sup> | Multivariable model <sup>2</sup> |
|--------------------------------|-----------------------------|---------------------------------|----------------------------------|
| Normal                         | ≤5 kg                       | 1.00 (Ref)                      | 1.00 (Ref)                       |
| Normal                         | >5 kg                       | 1.45 (0.84, 2.52)               | 1.35 (0.77, 2.39)                |
| Overweight                     | ≤5 kg                       | 1.26 (0.66, 2.42)               | 1.16 (0.59, 2.26)                |
| Overweight                     | >5 kg                       | 1.46 (0.69, 3.09)               | 1.17 (0.54, 2.54)                |
| Obese                          | ≤5 kg                       | 2.00 (1.03, 3.88)               | 1.62 (0.81, 3.25)                |
| Obese                          | >5 kg                       | 3.31 (1.71, 6.42)               | 2.23 (1.09, 4.55)                |

---

<sup>1</sup>Adjusted for age at enrollment

<sup>2</sup>Adjusted for age at enrollment, race/ethnicity, nativity, education, marital status, household income, parity, pregnancy intention, and smoking

<sup>3</sup> Underweight women excluded from this analysis due to small numbers
